# Supplementary material for: Interleukin 2 modulates thymic-derived regulatory T cell epigenetic landscape
Source: PubMed Central journal article supplement (PMC6299086; doi:10.1038/s41467-018-07806-6), 2018-12-18
Supplement: 41467_2018_7806_MOESM3_ESM.pdf [file 41467_2018_7806_MOESM3_ESM.pdf]

## Description of Additional Supplementary Files :

**Supplementary Data File 1 (related to Fig. 3b)**| List of common and unique ATAC-seq peaks in WT and *Il2ra*<sup>mut/mut</sup> thymic and LN T<sub>reg</sub> cells across gene organization.

**Supplementary Data File 2 (related to Fig. 3d)**| List of genes with unique peaks in WT versus *Il2ra*<sup>mut/mut</sup> thymic and LN T<sub>reg</sub> cells.

**Supplementary Data File 3 (related to Fig. 3e and Sup Fig. 3d)**| List of Biological Process Gene Ontology (BP-GO) from genes with unique peaks (OCRs) in WT versus *Il2ra*<sup>mut/mut</sup> thymic and LN T<sub>reg</sub> cells (all and 20kb from TSS).

**Supplementary Data File 4 (related to Fig. 4c)**| List of genes up and downregulated in WT versus *Il2ra*<sup>mut/mut</sup> T<sub>reg</sub> cells.

**Supplementary Data File 5 (related to Fig. 4d and Sup Fig. 4d,e)**| List of Biological Process Gene Ontology (BP-GO) from genes upregulated in *Il2ra*<sup>mut/mut</sup> versus WT T<sub>reg</sub> cells.

**Supplementary Data File 6 (related to Fig. 4e,g)**| List of differentially expressed genes in WT versus *Il2ra*<sup>mut/mut</sup> LN T<sub>reg</sub> cells compared to genes with unique peaks in WT and *Il2ra*<sup>mut/mut</sup> T<sub>reg</sub> cells within 500 bp from TSS.

**Supplementary Data File 7 (related to Fig. 5d)**| List of unique genes with (i) SATB1 peaks in WT SP CD4<sup>+</sup> thymocytes, (ii) SATB1 peaks in *Il2ra*<sup>mut/mut</sup> SP CD4<sup>+</sup> thymocytes and (iii) common genes with unique SATB1 peaks in WT and *Il2ra*<sup>mut/mut</sup> SP CD4<sup>+</sup> thymocytes.

**Supplementary Data File 8 (related to Fig. 5e,f)**| BP-GO terms of unique genes with SATB1 peaks in WT and in *Il2ra*<sup>mut/mut</sup> SP CD4<sup>+</sup> thymocytes.
